# Supplementary material for: Cell-free DNA fragmentomics and second malignant neoplasm risk in patients with PTEN hamartoma tumor syndrome
Source: PubMed Central journal article supplement — Cell Rep Med. 2024 Jan 18;5(2):101384. doi: 10.1016/j.xcrm.2023.101384 (PMC10897513; doi:10.1016/j.xcrm.2023.101384), 2024-01-18

**Cell Reports Medicine, Volume 5**

**Supplemental information**

**Cell-free DNA fragmentomics and second malignant  
neoplasm risk in patients  
with *PTEN* hamartoma tumor syndrome**

**Darren Liu, Lamis Yehia, Andrew Dhawan, Ying Ni, and Charis Eng**

**Table S1. *PTEN* Variation Spectra in Patients with PHTS, Related to Table 1.**

| <b>Characteristic</b>    | <b>N</b> | <b>Overall, N = 99<sup>a</sup></b> | <b>No Cancer, N = 50<sup>a</sup></b> | <b>PMN, N = 23<sup>a</sup></b> | <b>SMN, N = 26<sup>a</sup></b> | <b>P-value<sup>b</sup></b> |
|--------------------------|----------|------------------------------------|--------------------------------------|--------------------------------|--------------------------------|----------------------------|
| Variation Classification | 99       |                                    |                                      |                                |                                | 0.3                        |
| P/LP                     |          | 91 (92%)                           | 49 (98%)                             | 19 (83%)                       | 24 (92%)                       |                            |
| VUS                      |          | 4 (4%)                             | 1 (2%)                               | 2 (9%)                         | 1 (4%)                         |                            |
| Conflicting (VUS, LB)    |          | 4 (4%)                             | 1 (2%)                               | 2 (9%)                         | 1 (4%)                         |                            |
| Variation Effect         | 99       |                                    |                                      |                                |                                |                            |
| Missense                 |          | 29 (29%)                           | 18 (36%)                             | 5 (22%)                        | 6 (23%)                        |                            |
| Nonsense                 |          | 26 (26%)                           | 11 (22%)                             | 7 (30%)                        | 8 (31%)                        |                            |
| Frameshift truncating    |          | 16 (16%)                           | 7 (14%)                              | 4 (17%)                        | 5 (19%)                        |                            |
| Splice site              |          | 11 (11%)                           | 8 (16%)                              | 2 (8.7%)                       | 1 (4%)                         |                            |
| Large Deletion           |          | 11 (11%)                           | 6 (12%)                              | 3 (13%)                        | 2 (8%)                         |                            |
| Other                    |          | 6 (6%)                             | 0 (0%)                               | 2 (9%)                         | 4 (16%)                        |                            |
| Variation Site           | 99       |                                    |                                      |                                |                                | 0.2                        |
| Exonic                   |          | 80 (81%)                           | 38 (76%)                             | 18 (78%)                       | 24 (92%)                       |                            |
| Intronic                 |          | 11 (11%)                           | 8 (16%)                              | 2 (9%)                         | 1 (4%)                         |                            |
| Exonic and Intronic      |          | 5 (5%)                             | 4 (8%)                               | 1 (4%)                         | 0 (0%)                         |                            |
| Promoter                 |          | 3 (3%)                             | 0 (0%)                               | 2 (9%)                         | 1 (4%)                         |                            |

<sup>a</sup> n (%)

<sup>b</sup> Pearson's Chi-squared test; Fisher's exact test

P/LP, pathogenic/likely pathogenic; VUS, variant of uncertain significance; LB, likely benign

**Figure S1. Cumulative cfDNA Fragment Size Frequency Distribution in Patients with PHTS, Related to Figure 1.** Each line represents the median cumulative fragment size frequency across the mono-, di-, and tri-nucleosome fraction grouped by (A-C) cancer status, (D-F) SMN status, and (G-I) SMN status and plasma draw time.

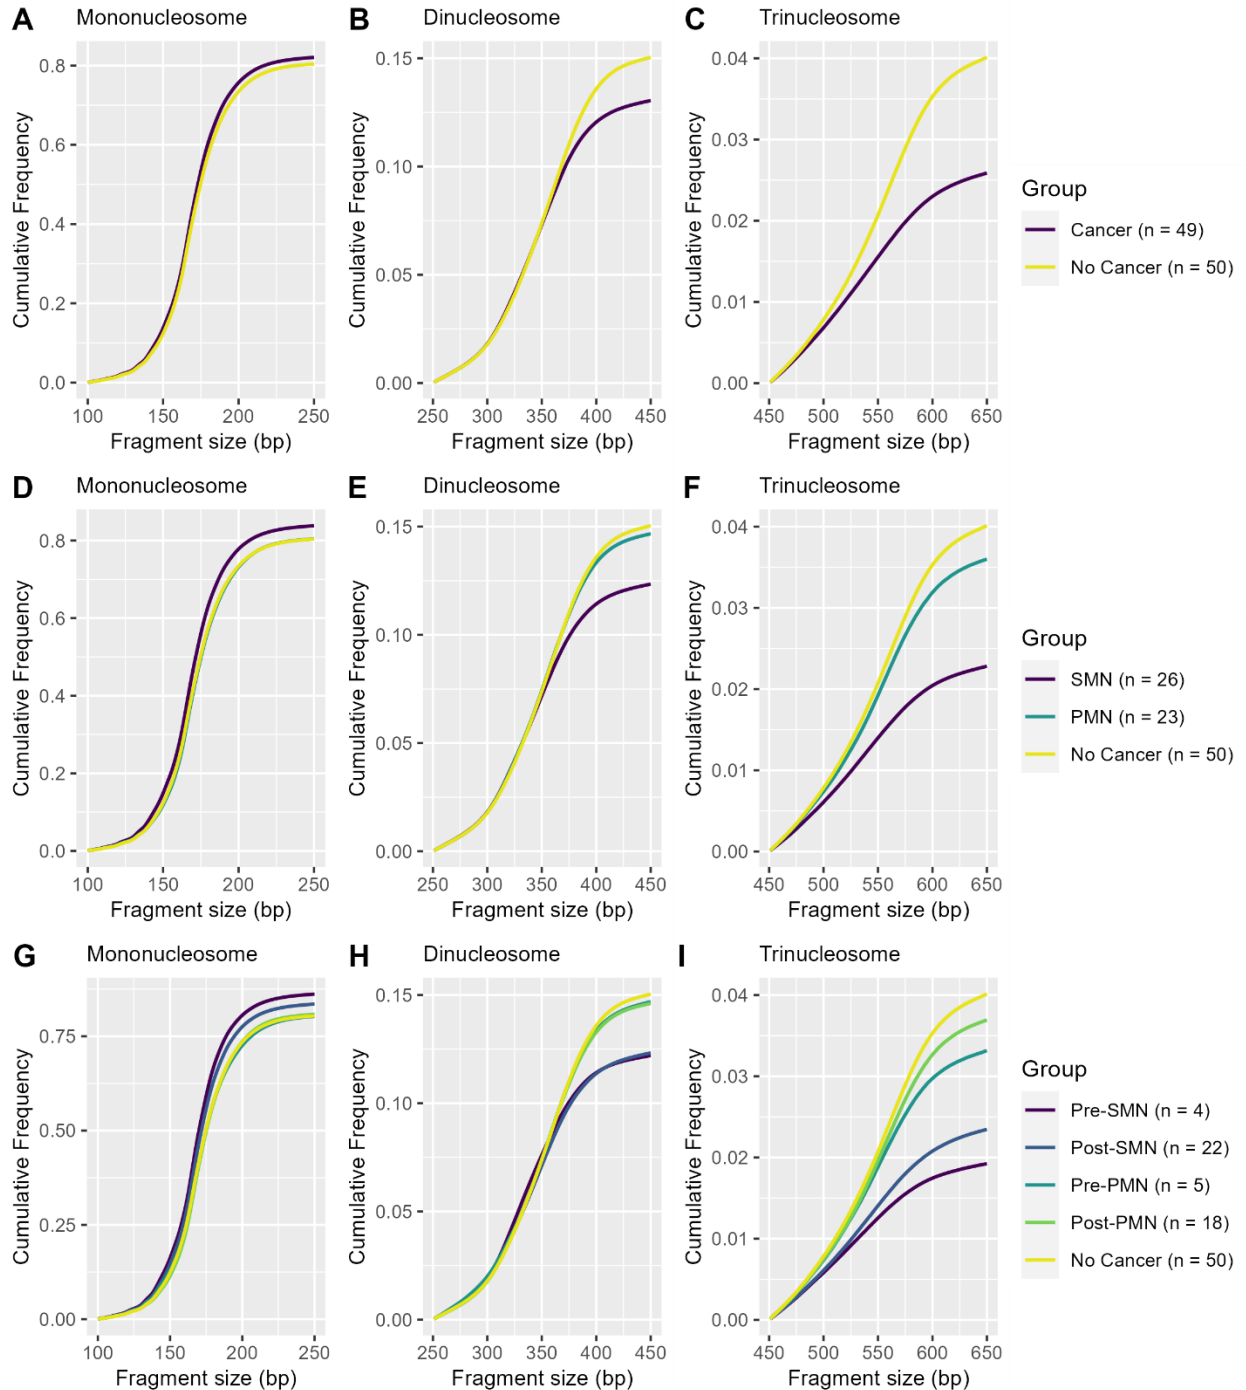

**Figure S2. Difference cfDNA Fragment Size Frequency Patients with PHTS, Related to Figure 1.** Each line represents the difference in the median fragment size frequency, denoted as  $\Delta F$ , of each cancer subgroup relative to patients with PHTS and no cancer across each nucleosome fraction grouped by (A-C) cancer status, (D-F) SMN status, and (G-I) SMN status and plasma draw time.

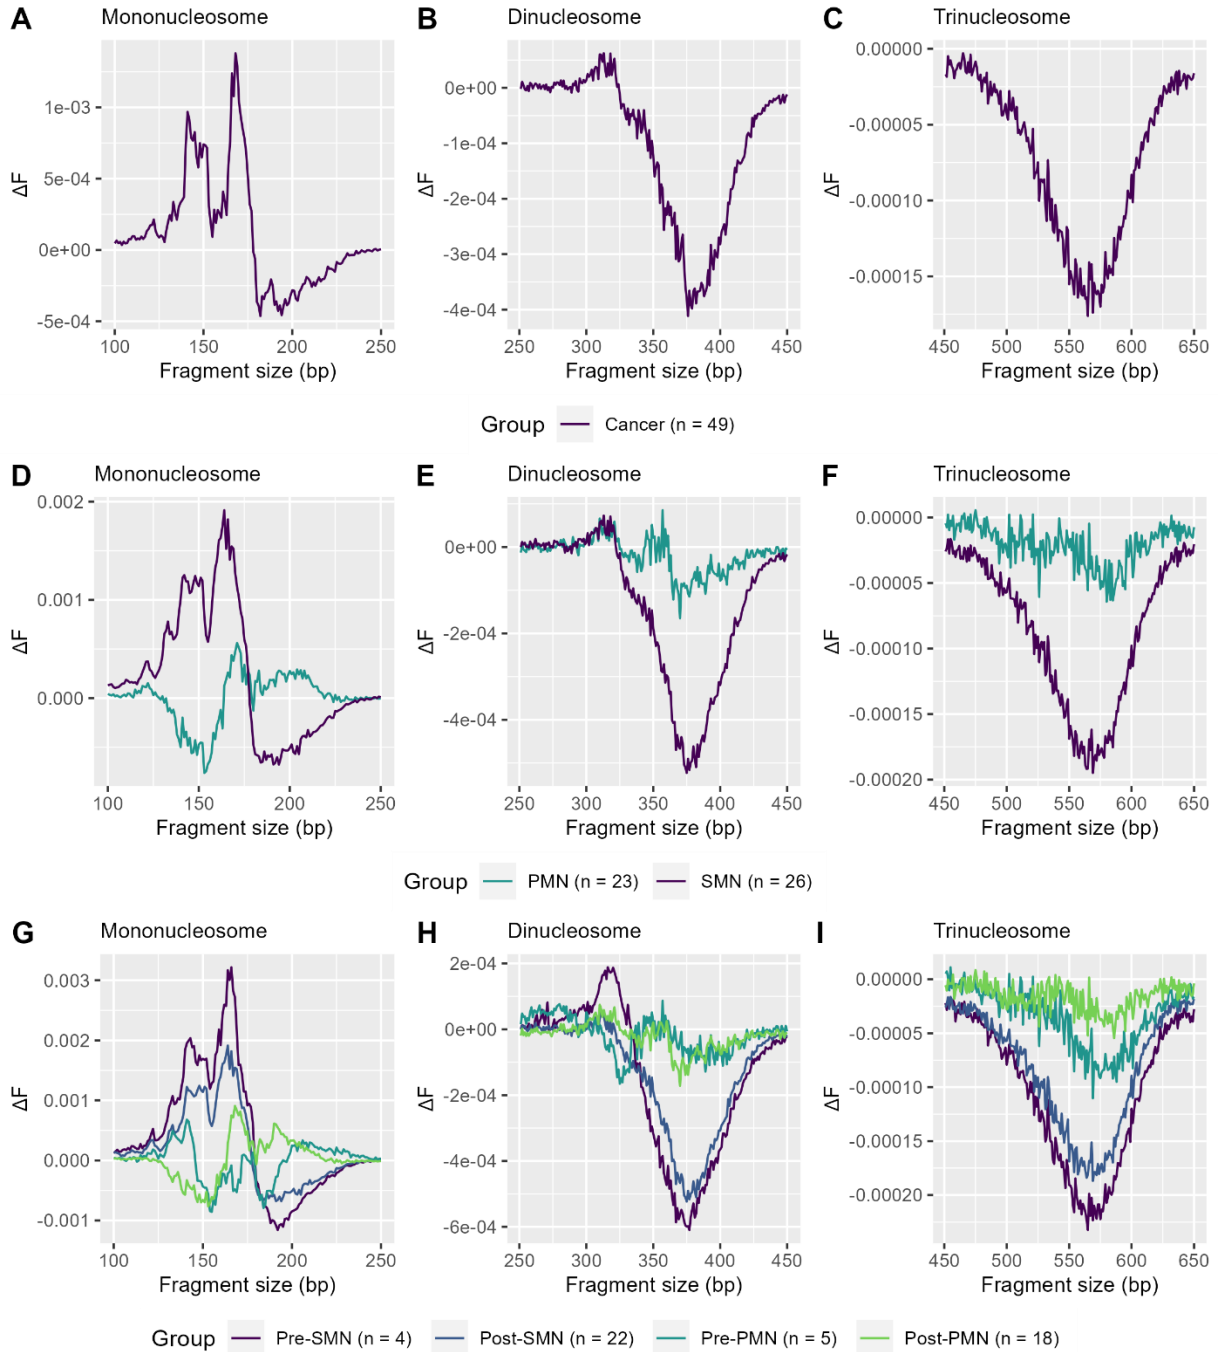

**Figure S3. Difference in Cumulative cfDNA Fragment Size Frequency Distribution in Patients with PHTS, Related to Figure 1.** Each line represents the difference in the cumulative median fragment size frequency, denoted as  $\Delta CF$ , of each cancer subgroup relative to patients with PHTS and no cancer across each nucleosome fraction grouped by (A-C) cancer status, (D-F) SMN status, and (G-I) SMN status and plasma draw time.

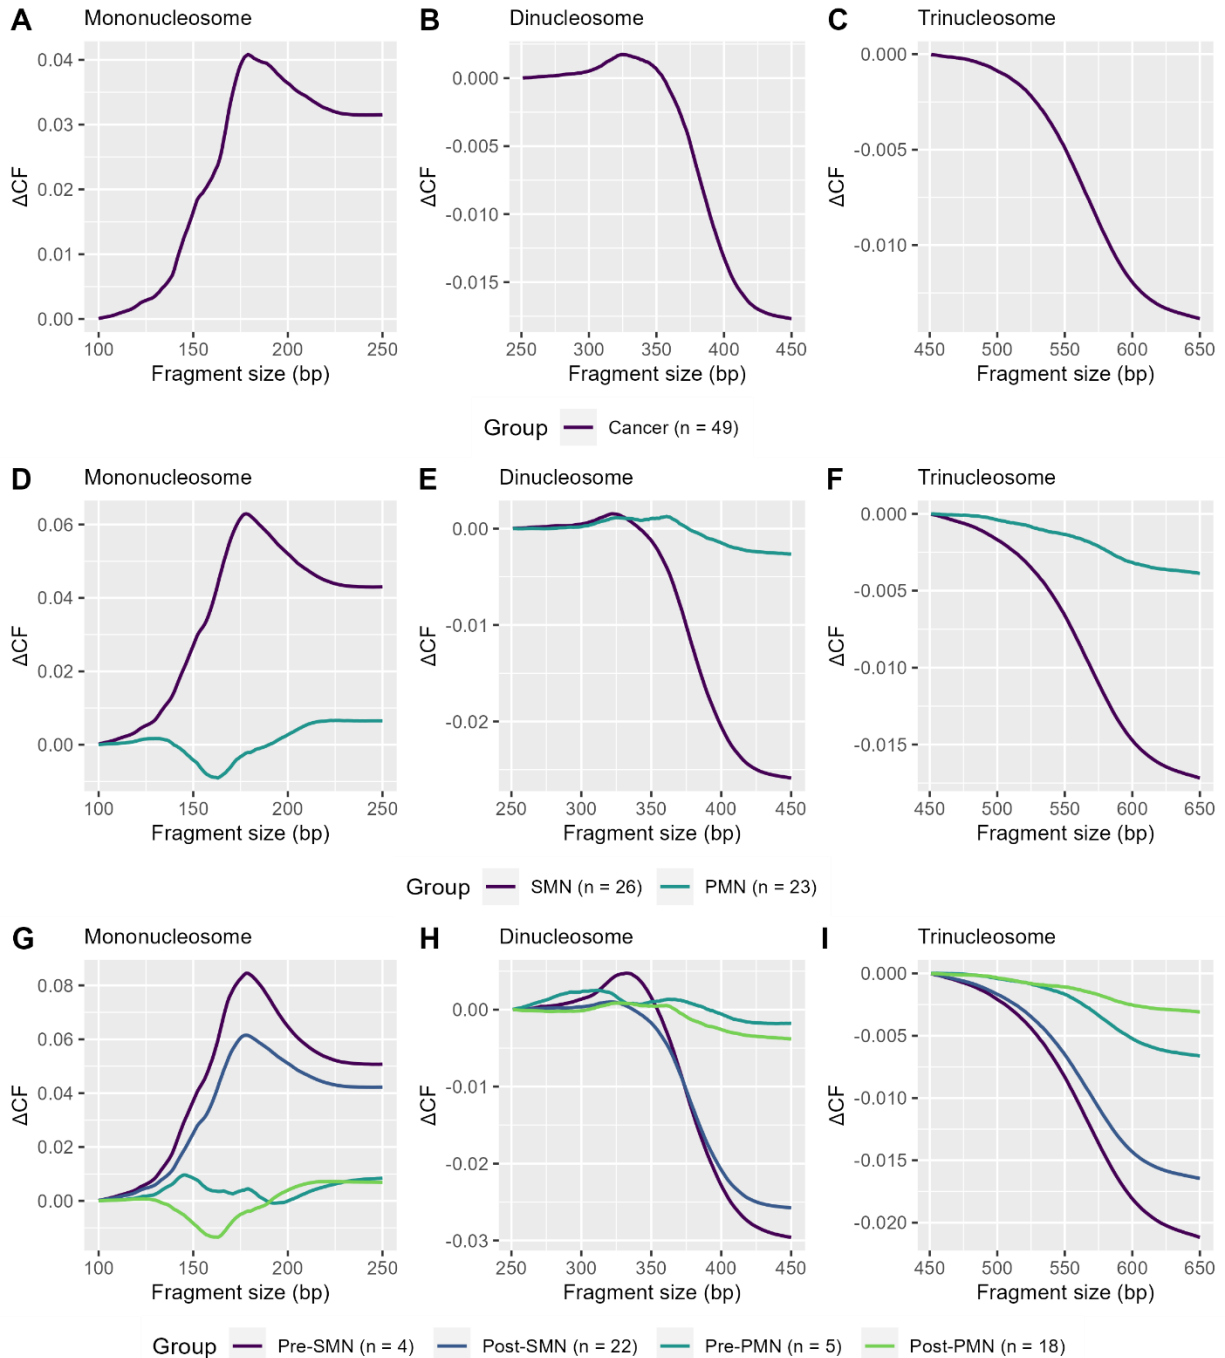

**Figure S4. Receiver Operating Characteristic (ROC) curve for Prediction of SMN, Related to Table 2.** Performance of models containing age of plasma draw, CC score (i.e., phenotypic burden), and fragment ratios from each nucleosome assessed utilizing Leave-One-Out Cross-Validation (LOOCV).

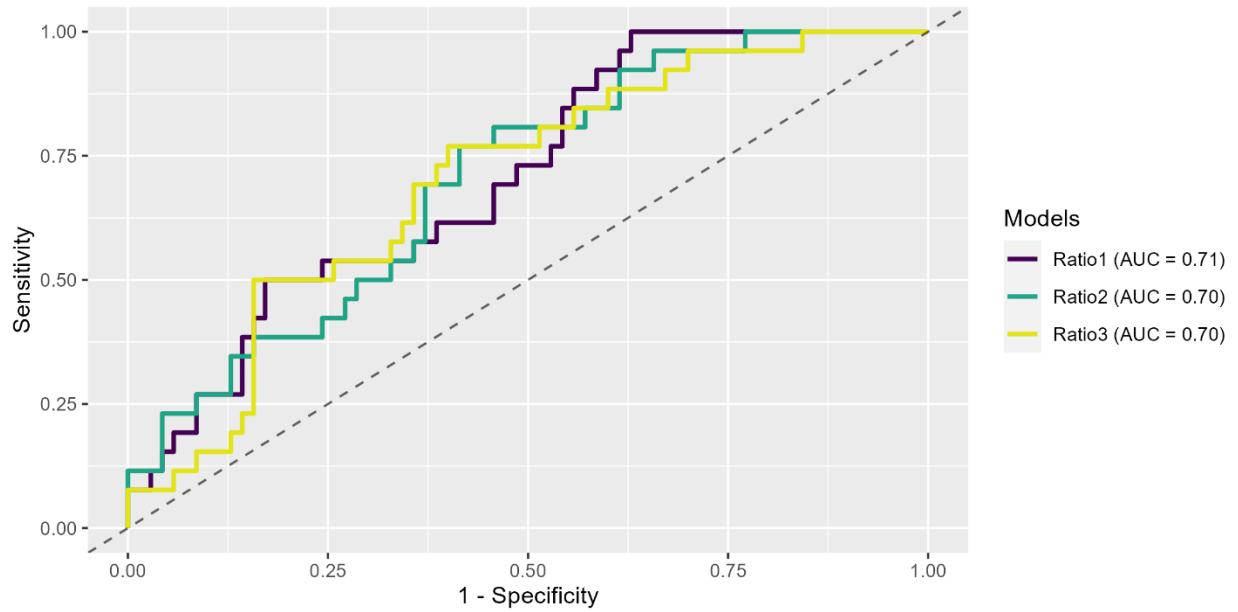

Supplement: mmc1.pdf [file mmc1.pdf]
